# Supplementary material
Source: Springer Nature journal article supplement (https://www.springermedizin.de/resource/supplementary/13063_2011_925_MOESM2_ESM.pdf/9618682)

# Comments in clinical notes from follow up visits with an 'unhealed' radiographic decision

## Changed to 'healed'

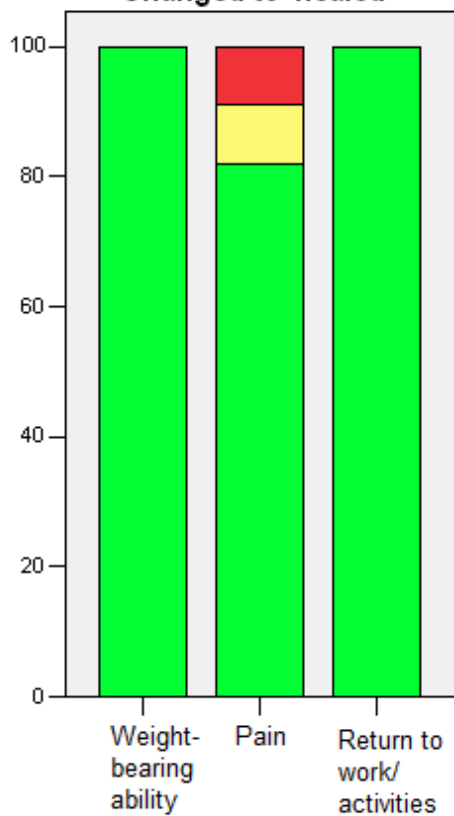

## No change

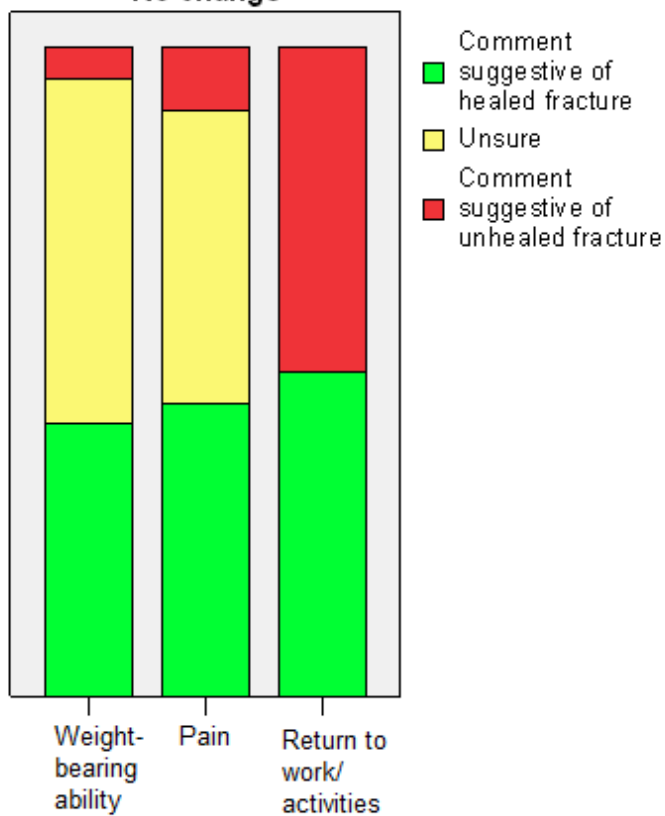

Supplement: MOESM2 [file 9618682]
